# Supplementary material for: Clinical Implication of Concordant or Discordant Genomic Profiling between Primary and Matched Metastatic Tissues in Patients with Colorectal Cancer
Source: PubMed Central journal article supplement — Cancer Res Treat. 2020 Feb 16;52(3):764–78. doi: 10.4143/crt.2020.044 (PMC7373863; doi:10.4143/crt.2020.044), 2020-02-16
Supplement: crt-2020-044-suppl1.pdf [file crt-2020-044-suppl1.pdf]

**S1 Table.** ICP panel genes

| Genes         | Location     | Exon count | Genes          | Location           | Exon count |
|---------------|--------------|------------|----------------|--------------------|------------|
| <i>ABL1</i>   | 9q34.12      | 12         | <i>JAK2</i>    | 9p24.1             | 26         |
| <i>AKT1</i>   | 14q32.33     | 16         | <i>JAK3</i>    | 19p13.11           | 25         |
| <i>ALK</i>    | 2p23.2-p23.1 | 29         | <i>IDH2</i>    | 15q26.1            | 12         |
| <i>APC</i>    | 5q22.2       | 18         | <i>KDR</i>     | 4q12               | 30         |
| <i>ATM</i>    | 11q22.3      | 69         | <i>KIT</i>     | 4q12               | 21         |
| <i>BRAF</i>   | 7q34         | 21         | <i>KRAS</i>    | 12p12.1            | 8          |
| <i>CDH1</i>   | 16q22.1      | 18         | <i>MET</i>     | 7q31.2             | 24         |
| <i>CDKN2A</i> | 9p21.3       | 8          | <i>MLH1</i>    | 3p22.2             | 21         |
| <i>CSF1R</i>  | 5q32         | 22         | <i>MPL</i>     | 1p34.2             | 11         |
| <i>CTNNB1</i> | 3p22.1       | 17         | <i>NOTCH1</i>  | 9q34.3             | 34         |
| <i>EGFR</i>   | 7p11.2       | 30         | <i>NPM1</i>    | 5q35.1             | 11         |
| <i>ERBB2</i>  | 17q12        | 32         | <i>NRAS</i>    | 1p13.2             | 7          |
| <i>ERBB4</i>  | 2q34         | 31         | <i>PDGFRA</i>  | 4q12               | 28         |
| <i>EZH2</i>   | 7q36.1       | 25         | <i>PIK3CA</i>  | 3q26.32            | 23         |
| <i>FBXW7</i>  | 4q31.3       | 17         | <i>PTEN</i>    | 10q23.31           | 10         |
| <i>FGFR1</i>  | 8p11.23      | 25         | <i>PTPN11</i>  | 12q24.13           | 16         |
| <i>FGFR2</i>  | 10q26.13     | 26         | <i>RBI</i>     | 13q14.2            | 28         |
| <i>FGFR3</i>  | 4p16.3       | 19         | <i>RET</i>     | 10q11.21           | 20         |
| <i>FLT3</i>   | 13q12.2      | 27         | <i>SMAD4</i>   | 18q21.2            | 12         |
| <i>GNA11</i>  | 19p13.3      | 7          | <i>SMARCB1</i> | 22q11.23;<br>22q11 | 9          |
| <i>GNAS</i>   | 20q13.32     | 22         | <i>SMO</i>     | 7q32.1             | 13         |
| <i>GNAQ</i>   | 9q21.2       | 8          | <i>SRC</i>     | 20q11.23           | 17         |
| <i>HNFI1A</i> | 12q24.31     | 9          | <i>STK11</i>   | 19p13.3            | 13         |
| <i>HRAS</i>   | 11p15.5      | 7          | <i>TP53</i>    | 17p13.1            | 12         |
| <i>IDH1</i>   | 2q34         | 12         | <i>VHL</i>     | 3p25.3             | 3          |
