# Supplementary material for: Clinical Implication of Concordant or Discordant Genomic Profiling between Primary and Matched Metastatic Tissues in Patients with Colorectal Cancer
Source: PubMed Central journal article supplement — Cancer Res Treat. 2020 Feb 16;52(3):764–78. doi: 10.4143/crt.2020.044 (PMC7373863; doi:10.4143/crt.2020.044), 2020-02-16
Supplement: crt-2020-044-suppl2.pdf [file crt-2020-044-suppl2.pdf]

**S2 Table.** The number of types of variants between the primary and matched metastatic tumors according to each patient

| Subject | Total variants | Deleterious ns variants | C | P  | M |
|---------|----------------|-------------------------|---|----|---|
| 1       | 16             | 2                       | 1 | 0  | 1 |
| 2       | 13             | 1                       | 0 | 1  | 0 |
| 3       | 14             | 3                       | 3 | 0  | 0 |
| 4       | 7              | 0                       | 0 | 0  | 0 |
| 5       | 3              | 0                       | 0 | 0  | 0 |
| 6       | 34             | 11                      | 1 | 10 | 0 |
| 7       | 10             | 2                       | 2 | 0  | 0 |
| 8       | 9              | 1                       | 0 | 0  | 1 |
| 9       | 28             | 7                       | 0 | 2  | 5 |
| 10      | 47             | 27                      | 1 | 24 | 2 |
| 11      | 6              | 2                       | 2 | 0  | 0 |
| 12      | 8              | 2                       | 2 | 0  | 0 |
| 13      | 13             | 5                       | 3 | 1  | 1 |
| 14      | 7              | 2                       | 0 | 0  | 2 |
| 15      | 10             | 5                       | 4 | 0  | 1 |
| 16      | 8              | 0                       | 0 | 0  | 0 |
| 17      | 6              | 1                       | 1 | 0  | 0 |
| 18      | 5              | 1                       | 1 | 0  | 0 |
| 19      | 6              | 1                       | 1 | 0  | 0 |
| 20      | 8              | 3                       | 1 | 2  | 0 |
| 21      | 10             | 4                       | 4 | 0  | 0 |
| 22      | 29             | 10                      | 4 | 0  | 6 |
| 23      | 10             | 3                       | 3 | 0  | 0 |
| 24      | 47             | 21                      | 1 | 20 | 0 |
| 25      | 25             | 5                       | 0 | 5  | 0 |
| 26      | 36             | 7                       | 0 | 0  | 7 |
| 27      | 9              | 4                       | 4 | 0  | 0 |
| 28      | 10             | 2                       | 1 | 1  | 0 |
| 29      | 7              | 3                       | 3 | 0  | 0 |
| 30      | 8              | 2                       | 2 | 0  | 0 |
| 31      | 10             | 2                       | 2 | 0  | 0 |
| 32      | 9              | 4                       | 3 | 1  | 0 |
| 33      | 5              | 2                       | 1 | 1  | 0 |
| 34      | 10             | 2                       | 1 | 0  | 1 |
| 35      | 12             | 4                       | 4 | 0  | 0 |
| 36      | 7              | 1                       | 1 | 0  | 0 |
| 37      | 3              | 2                       | 2 | 0  | 0 |
| 38      | 11             | 3                       | 3 | 0  | 0 |
| 39      | 6              | 1                       | 0 | 0  | 1 |
| 40      | 8              | 1                       | 1 | 0  | 0 |
| 41      | 8              | 2                       | 2 | 0  | 0 |

|    |    |    |   |    |    |
|----|----|----|---|----|----|
| 42 | 5  | 2  | 1 | 0  | 1  |
| 43 | 11 | 3  | 2 | 1  | 0  |
| 44 | 12 | 3  | 3 | 0  | 0  |
| 45 | 10 | 4  | 4 | 0  | 0  |
| 46 | 5  | 0  | 0 | 0  | 0  |
| 47 | 9  | 2  | 2 | 0  | 0  |
| 48 | 8  | 4  | 3 | 1  | 0  |
| 49 | 6  | 1  | 1 | 0  | 0  |
| 50 | 10 | 3  | 3 | 0  | 0  |
| 51 | 6  | 0  | 0 | 0  | 0  |
| 52 | 3  | 0  | 0 | 0  | 0  |
| 53 | 13 | 6  | 3 | 1  | 2  |
| 54 | 10 | 3  | 3 | 0  | 0  |
| 55 | 7  | 3  | 3 | 0  | 0  |
| 56 | 11 | 2  | 1 | 0  | 1  |
| 57 | 8  | 1  | 1 | 0  | 0  |
| 58 | 7  | 1  | 1 | 0  | 0  |
| 59 | 9  | 3  | 2 | 1  | 0  |
| 60 | 11 | 2  | 2 | 0  | 0  |
| 61 | 10 | 5  | 2 | 0  | 3  |
| 62 | 12 | 7  | 0 | 5  | 2  |
| 63 | 38 | 15 | 1 | 14 | 0  |
| 64 | 8  | 2  | 2 | 0  | 0  |
| 65 | 8  | 2  | 2 | 0  | 0  |
| 66 | 8  | 3  | 3 | 0  | 0  |
| 67 | 55 | 27 | 3 | 8  | 16 |
| 68 | 9  | 3  | 2 | 0  | 1  |
| 69 | 36 | 10 | 1 | 3  | 6  |
| 70 | 6  | 1  | 1 | 0  | 0  |
| 71 | 9  | 2  | 2 | 0  | 0  |
| 72 | 14 | 2  | 1 | 1  | 0  |
| 73 | 8  | 2  | 1 | 1  | 0  |
| 74 | 8  | 0  | 0 | 0  | 0  |
| 75 | 11 | 3  | 3 | 0  | 0  |
| 76 | 6  | 0  | 0 | 0  | 0  |
| 77 | 13 | 3  | 3 | 0  | 0  |
| 78 | 8  | 3  | 3 | 0  | 0  |
| 79 | 17 | 5  | 4 | 0  | 1  |
| 80 | 8  | 1  | 1 | 0  | 0  |
| 81 | 47 | 12 | 5 | 0  | 7  |
| 82 | 11 | 5  | 5 | 0  | 0  |
| 83 | 10 | 1  | 1 | 0  | 0  |
| 84 | 46 | 9  | 2 | 7  | 0  |
| 85 | 3  | 2  | 2 | 0  | 0  |
| 86 | 7  | 1  | 1 | 0  | 0  |
| 87 | 9  | 2  | 2 | 0  | 0  |

|     |    |    |   |   |    |
|-----|----|----|---|---|----|
| 88  | 7  | 4  | 3 | 1 | 0  |
| 89  | 9  | 2  | 2 | 0 | 0  |
| 90  | 13 | 3  | 2 | 1 | 0  |
| 91  | 15 | 0  | 0 | 0 | 0  |
| 92  | 13 | 2  | 2 | 0 | 0  |
| 93  | 22 | 3  | 3 | 0 | 0  |
| 94  | 18 | 3  | 3 | 0 | 0  |
| 95  | 13 | 2  | 2 | 0 | 0  |
| 96  | 10 | 1  | 1 | 0 | 0  |
| 97  | 8  | 1  | 1 | 0 | 0  |
| 98  | 29 | 5  | 0 | 5 | 0  |
| 99  | 15 | 4  | 2 | 2 | 0  |
| 100 | 81 | 21 | 2 | 9 | 10 |
| 101 | 14 | 3  | 2 | 0 | 1  |
| 102 | 22 | 3  | 0 | 2 | 1  |
| 103 | 14 | 2  | 1 | 0 | 1  |
| 104 | 21 | 3  | 2 | 1 | 0  |
| 105 | 24 | 5  | 2 | 1 | 2  |
| 106 | 28 | 3  | 2 | 1 | 0  |
| 107 | 20 | 2  | 2 | 0 | 0  |
| 108 | 23 | 5  | 3 | 0 | 2  |
| 109 | 22 | 4  | 2 | 2 | 0  |
| 110 | 16 | 2  | 1 | 0 | 1  |
| 111 | 23 | 6  | 4 | 0 | 2  |
| 112 | 24 | 8  | 2 | 2 | 4  |
| 113 | 20 | 7  | 0 | 4 | 3  |
| 114 | 18 | 4  | 3 | 1 | 0  |
| 115 | 20 | 5  | 1 | 3 | 1  |
| 116 | 30 | 7  | 3 | 1 | 3  |
| 117 | 20 | 4  | 0 | 3 | 1  |
| 118 | 7  | 2  | 1 | 1 | 0  |
| 119 | 22 | 5  | 0 | 3 | 2  |
| 120 | 9  | 2  | 2 | 0 | 0  |
| 121 | 20 | 7  | 4 | 3 | 0  |
| 122 | 15 | 2  | 1 | 0 | 1  |
| 123 | 27 | 8  | 1 | 4 | 3  |
| 124 | 34 | 10 | 5 | 3 | 2  |
| 125 | 21 | 3  | 3 | 0 | 0  |
| 126 | 18 | 6  | 1 | 3 | 2  |
| 127 | 29 | 6  | 0 | 1 | 5  |
| 128 | 23 | 7  | 4 | 3 | 0  |
| 129 | 23 | 5  | 3 | 0 | 2  |
| 130 | 25 | 3  | 1 | 1 | 1  |
| 131 | 21 | 4  | 0 | 2 | 2  |
| 132 | 34 | 7  | 2 | 4 | 1  |
| 133 | 29 | 6  | 3 | 3 | 0  |

|       |      |     |     |     |     |
|-------|------|-----|-----|-----|-----|
| 134   | 29   | 9   | 3   | 6   | 0   |
| 135   | 14   | 3   | 1   | 2   | 0   |
| 136   | 29   | 4   | 3   | 0   | 1   |
| 137   | 26   | 9   | 2   | 7   | 0   |
| 138   | 20   | 4   | 3   | 0   | 1   |
| 139   | 42   | 21  | 2   | 6   | 13  |
| 140   | 35   | 11  | 1   | 4   | 6   |
| 141   | 8    | 0   | 0   | 0   | 0   |
| 142   | 7    | 1   | 0   | 0   | 1   |
| 143   | 8    | 1   | 1   | 0   | 0   |
| 144   | 8    | 2   | 1   | 1   | 0   |
| 145   | 9    | 2   | 0   | 2   | 0   |
| 146   | 7    | 1   | 1   | 0   | 0   |
| 147   | 11   | 1   | 1   | 0   | 0   |
| 148   | 7    | 0   | 0   | 0   | 0   |
| 149   | 5    | 0   | 0   | 0   | 0   |
| 150   | 11   | 3   | 3   | 0   | 0   |
| 151   | 7    | 3   | 0   | 3   | 0   |
| 152   | 12   | 3   | 1   | 2   | 0   |
| 153   | 8    | 2   | 2   | 0   | 0   |
| 154   | 11   | 1   | 0   | 0   | 1   |
| 155   | 7    | 1   | 0   | 1   | 0   |
| 156   | 13   | 2   | 2   | 0   | 0   |
| 157   | 9    | 3   | 3   | 0   | 0   |
| 158   | 8    | 2   | 2   | 0   | 0   |
| Total | 2444 | 628 | 269 | 215 | 144 |

ns, non-synonymous; C, concordant; P, primary-specific; M, metastasis-specific.
