# Supplementary material for: Clinical Implication of Concordant or Discordant Genomic Profiling between Primary and Matched Metastatic Tissues in Patients with Colorectal Cancer
Source: PubMed Central journal article supplement — Cancer Res Treat. 2020 Feb 16;52(3):764–78. doi: 10.4143/crt.2020.044 (PMC7373863; doi:10.4143/crt.2020.044), 2020-02-16
Supplement: crt-2020-044-suppl3.pdf [file crt-2020-044-suppl3.pdf]

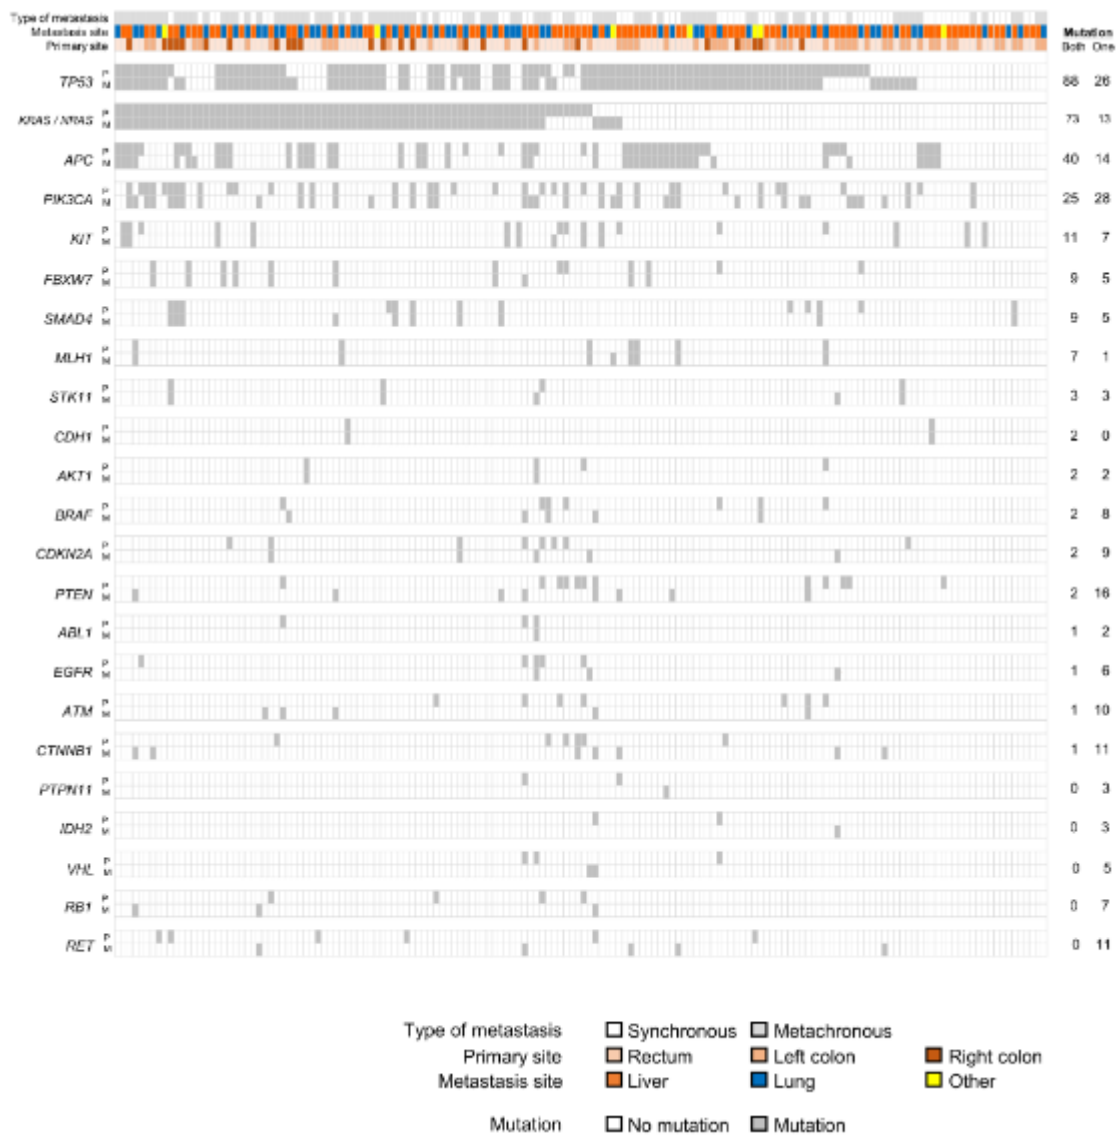

**S3 Fig.** Mutational landscape of 158 pairs of primary and metastatic tumors. For each gene, the upper row represents the primary tissue, and the lower row represents the metastatic tissue. Each column represents a patient. In the rightmost column, both mutations represent the number of patients with both mutations in primary and metastatic tissues regardless of concordance. One mutation represents the number of patients with one mutation only in primary or metastatic tissue.
