# Supplementary material for: Clinical Implication of Concordant or Discordant Genomic Profiling between Primary and Matched Metastatic Tissues in Patients with Colorectal Cancer
Source: PubMed Central journal article supplement — Cancer Res Treat. 2020 Feb 16;52(3):764–78. doi: 10.4143/crt.2020.044 (PMC7373863; doi:10.4143/crt.2020.044), 2020-02-16
Supplement: crt-2020-044-suppl8.pdf [file crt-2020-044-suppl8.pdf]

A

Patient 21

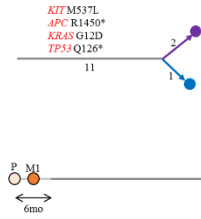

Patient 69

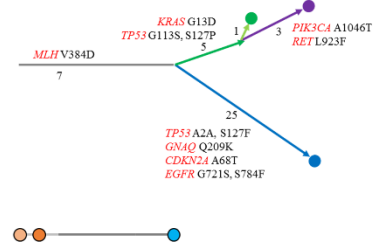

Patient 75

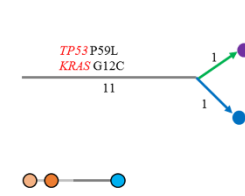

Patient 81

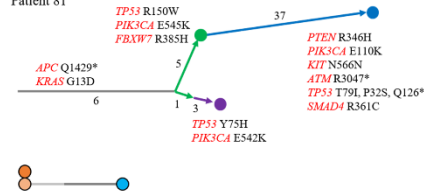

Patient 100

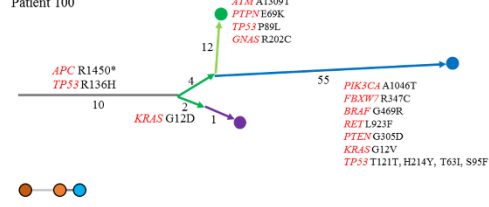

Patient 101

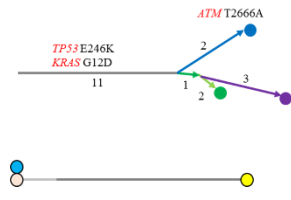

Patient 108

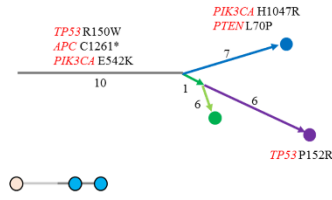

Patient 116

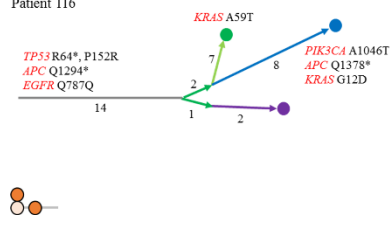

Patient 140

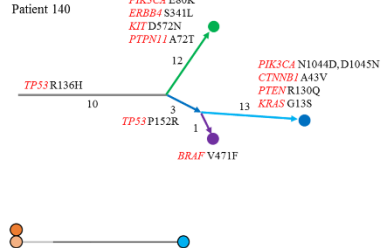

Patient 141

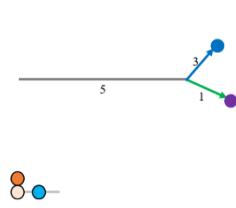

**B**

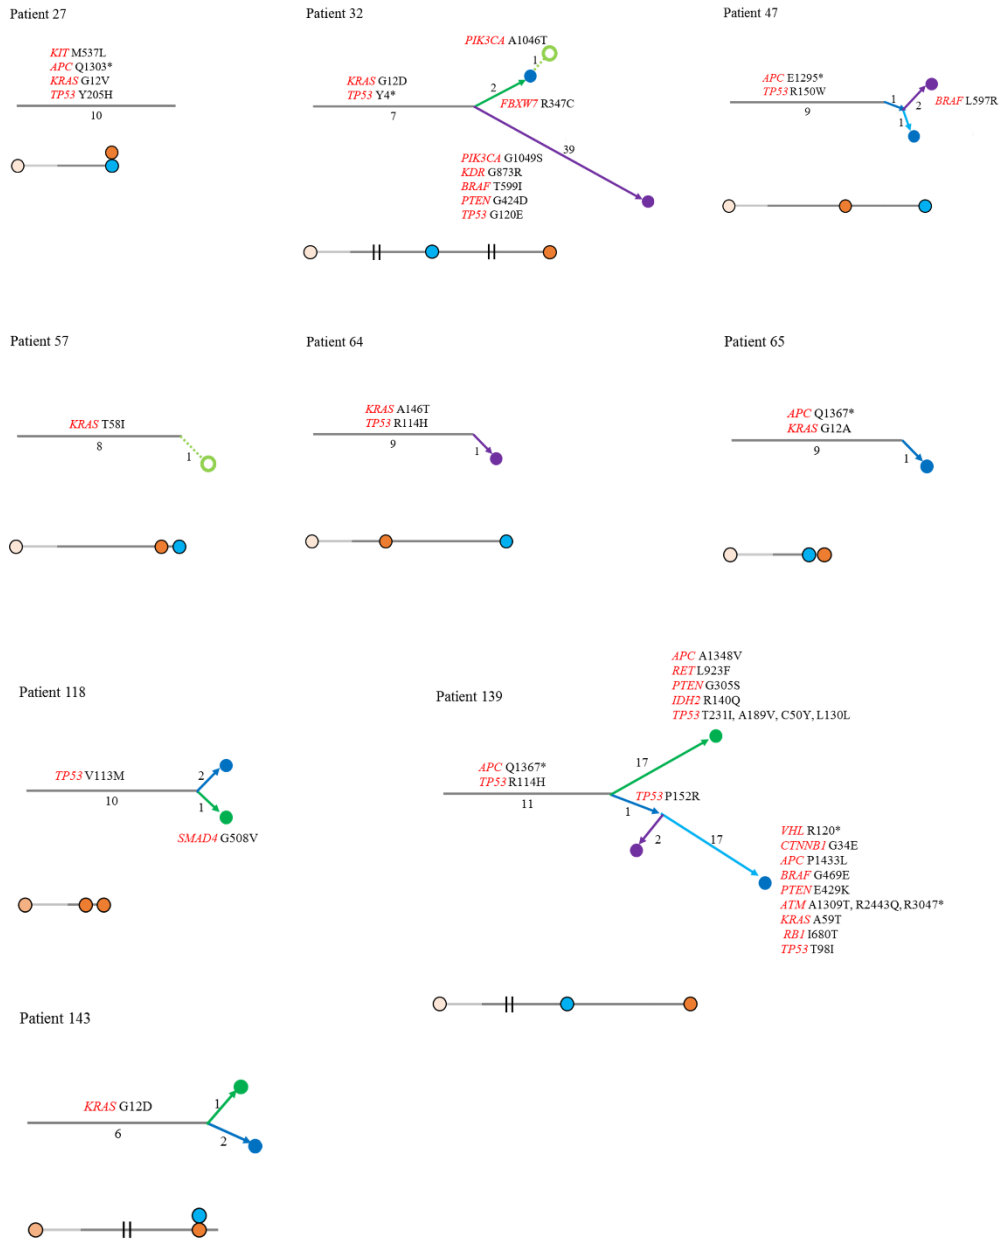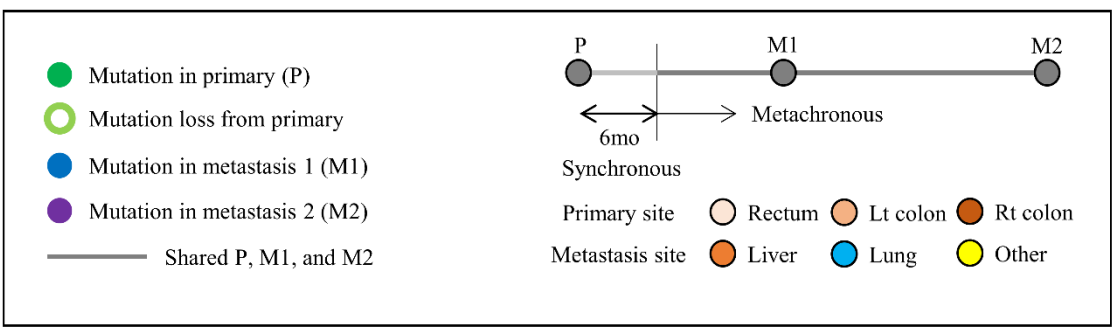

**S8 Fig.** Phylogenetic trees of 19 patients. Trees go from far left with events shared by all samples depicted on the gray line. Branches off this gray line represent events that are discrepant between primary and metastatic lesions. Key deleterious non-synonymous variants and total number of mutations are annotated. Asterisk denotes translation termination (stop) codon based on the human genome variation society (HGVS) nomenclature. (A) Patients with synchronous metastasis. (B) Patients with metachronous metastasis.
