# Supplementary figures and images for: Clinical Implication of Concordant or Discordant Genomic Profiling between Primary and Matched Metastatic Tissues in Patients with Colorectal Cancer
Source: PubMed Central journal article supplement — Cancer Res Treat. 2020 Feb 16;52(3):764–78. doi: 10.4143/crt.2020.044 (PMC7373863; doi:10.4143/crt.2020.044), 2020-02-16

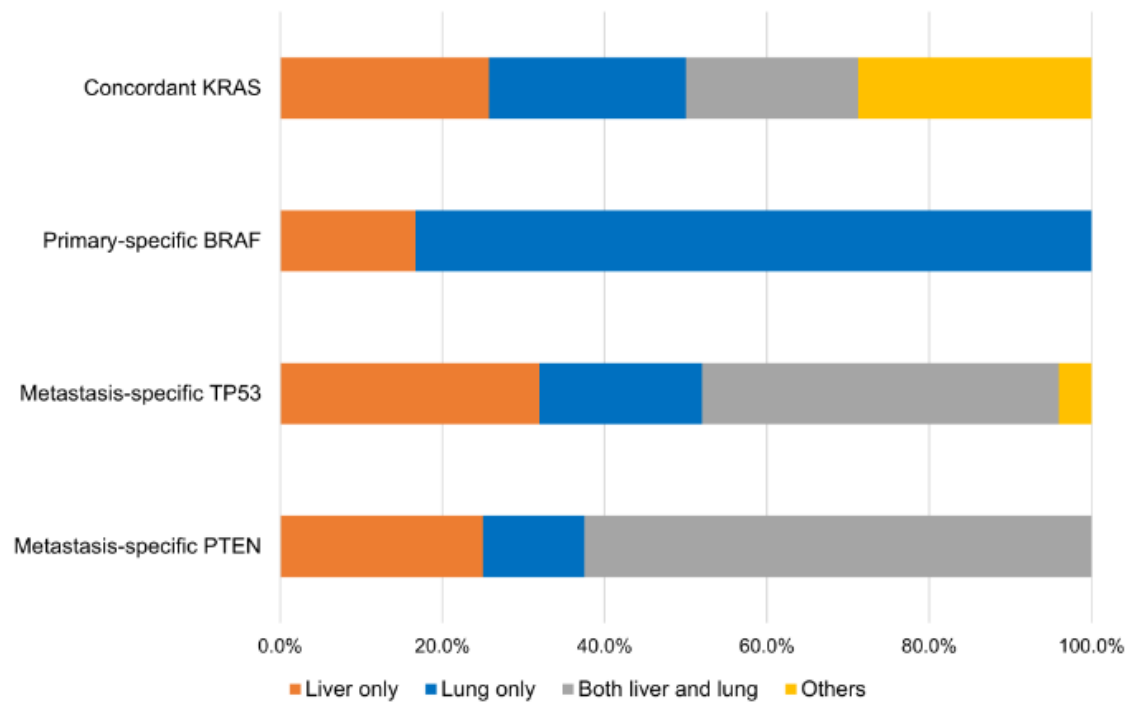

**S7 Fig.** The percentage of overall metastatic sites according to the mutated paired genes.

Supplement: crt-2020-044-suppl7.pdf [file crt-2020-044-suppl7.pdf]
